1 **CSB-dependent CDK9 degradation and RNA Polymerase II phosphorylation during**  
2 **Transcription Coupled Repair**

3

4 **Authors:**

5 *Lise-Marie Donnio<sup>1</sup>, Anna Lagarou<sup>1</sup>, Gabrielle Sueur<sup>2</sup>, Pierre-Olivier Mari<sup>1</sup> and Giuseppina Giglia-*  
6 *Mari<sup>1\*</sup>*

7

8 1 : Institut NeuroMyoGène (INMG), CNRS UMR 5310, INSERM U1217, Université de Lyon, Université  
9 Claude Bernard Lyon1, 16 rue Dubois, 69622 Villeurbanne CEDEX FRANCE

10

11 2 : CNRS; IPBS (Institut De Pharmacologie Et De Biologie Structurale); 205 Route De Narbonne,  
12 Bp64182, F-31077 Toulouse, France

13

14 \*to whom correspondence and request for materials should be addressed :

15 G G-M : PHONE : 0426688263

16 EMAIL : [ambra.mari@univ-lyon1.fr](mailto:ambra.mari@univ-lyon1.fr).

17

18 **RUNNING TITLE: RESTART OF TRANSCRIPTION AFTER DNA REPAIR**

19

20 **KEYWORDS:** TRANSCRIPTION, HEXIM1, RNA POLYMERASE II, CDK9, DNA REPAIR

21

22 **ABBREVIATIONS:**

23 TCR: TRANSCRIPTION COUPLED REPAIR; RTR: RESUMPTION OF TRANSCRIPTION AFTER REPAIR; NER:

24 NUCLEOTIDE EXCISION REPAIR; RNAP2: RNA POLYMERASE II

25

26

27 **AUTHOR SUMMARY**

28 DNA lesions block cellular processes such as transcription, inducing apoptosis, tissue failures and  
29 premature ageing. To counteract the deleterious effects of DNA damage, cells are equipped with  
30 various DNA repair pathways. Transcription Coupled Repair specifically removes helix-distorting DNA  
31 adducts in a coordinated multi-step process. This process has been extensively studied, however  
32 once the repair reaction is accomplished, little is known about how transcription restarts. In this  
33 study, we show that, after UV irradiation, the CDK9/CyclinT1 kinase unit is specifically released from  
34 the HEXIM1 complex and that this released fraction is degraded in the absence of CSB. We determine  
35 that UV-irradiation induces a specific Ser2 phosphorylation of the RNA polymerase II and that this  
36 phosphorylation is CSB dependent. Surprisingly CDK9 is not responsible for this phosphorylation but  
37 instead plays a non-enzymatic role in transcription restart after DNA repair.

38

## 39 Introduction

40 Cells are the units of organic life and store in their nuclei, under the form of the DNA  
41 molecule, what constitutes the instruction manual for proper cellular functioning. Despite the  
42 protection offered by the cellular environment, the integrity of DNA is continuously challenged by a  
43 variety of endogenous and exogenous agents (*e.g.* ultraviolet light, cigarette smoke, environmental  
44 pollution, oxidative damage, etc ...) that cause DNA lesions, interfering with proper cellular functions,  
45 *in fine* causing the aging or premature aging of the tissue and later on of the whole organism.

46 To prevent the deleterious consequences of persisting DNA lesions, all organisms are  
47 equipped with a network of efficient DNA damage responses and DNA repair systems. One of these  
48 systems is the Nucleotide Excision Repair (NER). NER removes helix-distorting DNA adducts such as  
49 UV-induced lesions (Cyclo-Pyrimidine Dimers and 6-4 Photoproducts, CPD and 6-4PP) in a  
50 coordinated multi-step process (1).

51 The NER system has been linked to rare human diseases classically grouped into three  
52 distinct NER-related syndromes. These include the highly cancer prone disorder xeroderma  
53 pigmentosum (XP) and the two progeroid diseases: Cockayne syndrome (CS) and trichothiodystrophy  
54 (TTD) (2). Importantly, CS and TTD patients are not cancer-prone but present severe neurological and  
55 developmental features.

56 NER exists in two distinct sub-pathways depending where DNA lesions are located within the  
57 genome. Global Genome Repair (GG-NER or GGR) will repair DNA lesion located on non-transcribed  
58 DNA. While, the second sub-pathway is directly coupled to transcription elongation and repairs DNA  
59 lesions located on the transcribed strand of active genes and it is designated as Transcription-  
60 Coupled Repair (TC-NER or TCR).

61 RNAP2 frequently deals with obstacles that need to be removed through the TCR process for  
62 resumption of transcription (3). Constant blockage of transcription has severe consequences for the  
63 cell, since it might be a signal for apoptosis. Deficient TCR is illustrated in CS patients, a rare inherited  
64 syndrome characterized by multi-system clinical malfunctions, growth and neurological

65 abnormalities and features of premature ageing due to increased apoptosis. At the cellular level, a  
66 hallmark of CS is the inability to resume RNA synthesis after exposure to UV-light (4-6). This not only  
67 identifies TCR as a crucial defense mechanism against DNA damage for cells and organisms to escape  
68 from lethal effects of transcription inhibition, but also highlights the great importance of  
69 transcriptional resumption *after* repair of the damaged transcribed strand.

70 During a TCR event two phases can be distinguished: (i) the actual repair of the damaged  
71 strand *via* the TCR sub-pathway and (ii) the resumption of transcription after repair (RTR).

72 Although the TCR repair process has been extensively described, the molecular mechanisms  
73 implicated in RTR and the specific proteins involved are still elusive. The regulation of resumption of  
74 transcription after repair is highly important given that improper restart leads to cellular malfunction  
75 and apoptosis, and concomitantly contributes to ageing.

76 Interestingly, there has been some recent progress, concerning the complex, yet poorly  
77 defined, mechanism, which allows transcription resumption after DNA repair. These studies open the  
78 way for a deeper understanding on the RTR mechanism at different levels (7) (8) (9) (10). One of  
79 these studies describe the identification of an RNAP2 elongation factor (ELL: eleven-nineteen lysine-  
80 rich leukemia) as a new partner of the basal transcription repair factor TFIIH (8). The best-  
81 characterized function of ELL is to increase the catalytic rate of RNA Polymerase II transcription by  
82 suppressing transient pausing by Polymerase at multiple sites along the DNA during elongation (11).  
83 The combination of the UV-sensitivity, the absence of RNA recovery synthesis (RRS) and the  
84 unchanged DNA synthesis (UDS), illustrated in ELL-depleted cells upon UV-irradiation, suggest that  
85 ELL is an indirect TCR-repair factor, which plays a more specific role during RTR. To date, these results  
86 favor a possible model where ELL is recruited to the arrested RNAP2 by its interaction with TFIIH and  
87 functions as a platform for other elongation factors in order to facilitate RTR (8).

88 Several groups have reported *in vitro* that ELL and the positive transcription elongation factor  
89 b (P-TEFb) exist in complexes with multiple MLL translocation partners, called Super Elongation

90 Complexes (SECs) (12). P-TEFb consists of a heterodimeric kinase, composed of CDK9 and its Cyclins  
91 (K/T1/T2), which play a central role in the release of RNAP2 from pausing. In mammalian cells, the  
92 CDK9 subunit of pTEF-b phosphorylates RNAP2 at its Ser-2 carboxy-terminal domain (CTD) repeat to  
93 license assembly of multiple factors critical for mRNA biogenesis, chromatin modification during  
94 transcription (13) and for marking transcription elongation (14). Interestingly, phosphorylation of the  
95 CTD does not directly affect elongation rate but instead mediates interactions between the  
96 polymerase and other factors (15). Therefore, the Ser5P to Ser2P transition could either promote the  
97 association and activity of positive elongation factors, or inhibit pathways that causes RNAP2 to  
98 pause or terminate early in elongation. Hence it is possible that ELL functions via its interaction with  
99 the positive elongation factor (pTEF-b) and its subsequent recruitment, in order to facilitate  
100 transcriptional resumption after repair of the transcription blocking DNA lesion.

101 In this article we investigated the role of CDK9 during transcription-coupled repair (TCR) and  
102 most precisely during resumption of transcription after DNA repair (RTR). Our results clearly show  
103 that CDK9 plays a role during RTR but that, differently from its function during release of paused  
104 RNAP2 molecules, this role is not dependent on its kinase activity and that, in the absence of CDK9,  
105 RTR is delayed and RNAP2 molecules remain bound to the chromatin after UV irradiation.  
106 Interestingly, we could highlight a specific DNA-damage dependent dissociation of CDK9 and CycT  
107 from the 7SK snRNP complex and a degradation of CDK9 and CycT after UV-irradiation in TCR  
108 deficient cells. Finally, we could reveal that during RTR the RNAP2 is unambiguously phosphorylated  
109 at the Ser2 position (independently from Cdk9 kinase activity) and that this phosphorylation is absent  
110 in TCR-deficient cells.

111

## 112 **Results**

### 113 *CDK9 function during Nucleotide Excision Repair*

114           Because of the strong relation between ELL and CDK9 (12), we decided to explore the role of  
115 CDK9 in DNA Repair and particularly within the Nucleotide Excision Repair system. This repair  
116 pathway can be subdivided into GGR (Global Genome Repair) and TCR (Transcription Couple Repair).

117           Repressing CDK9 expression by siRNA in normal human MRC5 fibroblasts led to no UV-  
118 specific cytotoxicity, comparable to mock-knocked down cells, as measured by clonogenic survival  
119 (Fig 1A). As a positive control, the knockdown of the well-known NER endonuclease XPF was used,  
120 which, as expected, produced severe UV cytotoxicity. This result clearly indicates that CDK9 absence  
121 does not confer UV sensitivity to cells.

122           While cell survival after UV treatment is a general measure of the cellular DNA repair activity,  
123 the golden standard to quantify GGR activity is the Unscheduled DNA Synthesis after UV treatment.  
124 This assay quantifies DNA replication after repair, i.e. the refilling of single-strand DNA gaps  
125 generated by NER processing of UV-induced DNA lesions within locally UV-exposed cell nuclei. As  
126 expected for NER-deficient cells unable to process UV lesions, XPF siRNA treated cells showed a  
127 strong reduction in UDS levels (Fig 1B). CDK9-depleted cells showed no significant decrease in UDS  
128 levels, as in mock-knock down cells, suggesting that CDK9 is not an essential factor during GGR.  
129 Additionally, no endogenous CDK9 local damage accumulation was observed when MRC5 cells were  
130 locally UV-irradiated (Fig S1).

131           These results show that CDK9 is not involved in the GGR sub-pathway but do not exclude  
132 that CDK9, as hypothesize by its role within transcription, could be involved in TCR and RTR. In fact,  
133 proteins involved in TCR are not easily visualized on the damage areas. This is mainly due to the low  
134 level of TCR (10%) versus GGR (90%) in the cells (8) and intrinsically because the TCR reactions are  
135 primarily related to the transcribed genes, their number is hence limited to the number of active  
136 transcriptions.

137           The golden standard assay to measure TCR activity in the cell is the RRS (RNA-Recovery  
138 Synthesis). In this assay, transcriptional activity is visualized by detecting and quantifying the newly  
139 synthesized RNA via the incorporation of a fluorophore-coupled nucleoside analog. The experiment  
140 is conducted at different time points after UV induction (2h, 5h, 18h and 26 h), allowing quantifying  
141 the decline in transcriptional activity after UV damage (5 hours after UV irradiation) and the restart  
142 of activity after repair of the DNA damage (18 hours after UV irradiation). We used this test to  
143 quantify TCR activity in globally UV-irradiated siRNA-treated cells. Because CDK9 silencing might  
144 affect global transcription (16), we quantified the residual transcriptional activity during our  
145 experiments. We could measure that 30% CDK9 protein is still present in the cells after silencing (Fig  
146 S2) and that this amount results in a 70% residual basal transcription activity (Fig S3). In order to  
147 quantify only the effect of CDK9 silencing on TCR, we took into account the reduction in  
148 transcriptional activity observed when CDK9 is silenced and normalized the mRNA production at 2, 5,  
149 18 and 26 hours to the non-irradiated condition. As a positive control during RRS, CSB (an established  
150 repair factor, working specifically in TCR) knocked-down cells have been used. As expected, in the  
151 absence of CSB, no restart of transcription after UV damage is observed. Knockdown of CDK9  
152 resulted in a significantly reduced RNA synthesis at 18 h after UV with a full recovery of RNA  
153 synthesis at later time points (Fig 1C), showing that the reduction of CDK9 retards the recovery of  
154 transcription after UV damage, affecting the TCR pathway (either retarding the repair reaction or  
155 delaying the restart of transcription after completion of DNA repair).

156           In order to discriminate whether CDK9 plays a role in the repair process or in the restart of  
157 transcription after repair, we performed an assay designed previously in our group which specifically  
158 measures repair replication during TCR: the TCR-UDS assay (8). We treated with siCDK9 and siXPF,  
159 XPC-mutant cells (GGR-deficient) in order to be able to monitor only TCR-specific replication levels  
160 within locally UV-exposed nuclear regions. In order to precisely localize the UV-induced DNA-  
161 damaged areas, a co-immunofluorescence labeling of  $\gamma$ -H2AX was performed and repair replication  
162 was quantified. In siXPF treated XPC-negative cells both GGR and TCR pathways are compromised

163 and, as expected, low TCR-UDS levels were observed (Fig 1D). In contrast, the knockdown of CDK9  
164 resulted in normal TCR-UDS levels comparable to the levels seen in mock-knocked down cells. This  
165 result combined with the RRS results (Fig 1C) shows that CDK9 is not involved in the repair reaction  
166 *per se*, but that Resumption of Transcription after DNA Repair (RTR) is delayed when CDK9 is knocked  
167 down.

168

### 169 UV-irradiation induces a dissociation of the CDK9-HEXIM1 complex

170 In order to study in details the role of CDK9 during RTR, we generated stably expressing GFP-  
171 tagged CDK9 (CDK9-GFP) SV40-immortalized human fibroblasts (MRC5SV40, here after MRC5). A  
172 simplified scheme of the recombinant fused-protein is depicted in Figure S4A. High-resolution  
173 confocal imaging of these cell lines revealed that CDK9-GFP is mainly present in the nucleoplasm, and  
174 absent in the nucleoli and/or the cytoplasm (Fig S4B). By performing immunofluorescence  
175 experiments on fixed-cells exogenously expressing CDK9-GFP, we confirmed that the cellular  
176 localization of the recombinant protein is very similar to that of the endogenous proteins (Fig S4B).  
177 Immunoblot analysis on whole cell extracts of CDK9-GFP expressing cells has been used to quantify  
178 the ratio of the recombinant protein expression in comparison with the endogenous untagged  
179 protein. As shown in Figure S4C, CDK9-GFP expression is equivalent to the endogenous CDK9.

180 We could previously show that ELL is localized on locally damaged nuclear regions (8).  
181 Because of the physical interactions between ELL and CDK9 (12) we investigated whether CDK9 is  
182 also recruited on these damaged regions. We compared CDK9 immediate recruitment on DNA  
183 lesions to the accumulation of the TCR-specific protein CSA (Fig 2A). Confocal time-lapse images of  
184 living CDK9-GFP and CSA-GFP were taken after induction of local damage and the accumulation of  
185 the two proteins on these locally damaged areas was quantified. Interestingly, in contrast to CSA and  
186 ELL (8), there is no accumulation of CDK9 to the DNA damage. (Fig2A and 2B). This is not due to  
187 higher expression of the endogenous CDK9 in comparison with the GFP-tagged version, since their  
188 expression is equivalent as shown above (Fig S4C).



189           However, it has to be noticed that these recruitment measurements were obtained seconds  
190 after the induction of DNA damage. To quantify a possible recruitment of CDK9 on damaged DNA at  
191 later time points after UV irradiation, we applied the Strip-FRAP (Fluorescence Recovery After  
192 Photobleaching) method (17), in which fluorescent molecules are photo-bleached in a small strip by a  
193 high intensity laser pulse and then the subsequent recovery of fluorescence is monitored in time  
194 within the bleached area. Without any damage, this measure of fluorescence recovery corresponds  
195 to the protein mobility within the living cell. However, when UV-irradiation is applied, a protein that  
196 physically interacts with the damage will be slowed down (due to the interactions with the substrate)  
197 and the recovery of fluorescence will be reduced. Unexpectedly, as shown in Figure 2C, instead of  
198 having a reduced mobility (as repair proteins have), CDK9 becomes more mobile after UV irradiation.  
199 This might suggest the existence of fraction of CDK9 that is part of a larger complex with lower  
200 mobility, from which CDK9 dissociates upon UV-induced DNA damage in order to execute its specific  
201 role during the RTR process. In absence of damage, CDK9 interacts physically with HEXIM1 (18), a  
202 subunit of the 7SK snRNP complex, which inhibits the kinase activity of CDK9 (18) within the P-TEFb  
203 complex. Because UV-dependent transcription inhibition induces a dissociation of P-TEFb from the  
204 7SK snRNP complex (19), we wanted to confirm that in our experiments and at our time points, CDK9  
205 increased mobility, measured by FRAP, could be a result of the dissociation of CDK9 from HEXIM1. In  
206 order to verify this hypothesis, we immuno-precipitated HEXIM1 and quantified the amount of CDK9  
207 and CyclinT1 found together with HEXIM1. As expected, in absence of DNA damage, HEXIM1 and  
208 CDK9/CyclinT1 could be co-immuno-precipitated (Fig 2D and 2E). However, 2 to 4 hours after UV-  
209 irradiation a lower amount of CDK9/CyclinT1 could be immuno-precipitated together with HEXIM1  
210 showing, as previously reported (19) that UV-irradiation causes a dissociation of CDK9/CyclinT1 from  
211 HEXIM1 (Fig 2D and 2E), demonstrating that our FRAP method can be used to measure  
212 CDK9/HEXIM1 UV-dependent dissociation.

213

214 UV-dependent degradation of CDK9/Cyclin 1 in the absence of CSB

215 To verify that CDK9/HEXIM1 UV-dependent dissociation is also dependent on the TCR  
216 reaction, we measure CDK9 mobility upon UV damage in the absence of CSB, hence a TCR deficient  
217 background. Interestingly, in the absence of CSB, the release of CDK9 from HEXIM1 upon UV-  
218 induction is lost (Fig 3A and Fig2C). This result can be explained by invoking that the remobilization  
219 from HEXIM1 of CDK9 after UV damage takes place via a CSB and probably TCR-dependent  
220 mechanism or that the released fraction is rapidly degraded in the absence of CSB. This last  
221 hypothesis was confirmed by the fact that unexpectedly, we could notice that after UV-irradiation, in  
222 both CSB deficient cells and CSB knocked down cells, the amount of CDK9/CyclinT1 was consistently  
223 reduced compared to the amount of HEXIM1 (Fig 3B and 3C).

224 These combined results (FRAP and Immuno-blot) demonstrate that specifically after UV  
225 irradiation the complex CDK9/CyclinT1 is released from Hexim1 complex, but if the DNA repair factor  
226 CSB is absent, this free fraction is rapidly degraded after UV irradiation.

227

#### 228 UV irradiation induces a CSB-dependent RNAP2 Serine 2 phosphorylation

229 During transcription-coupled repair, the first protein that encounters the lesion is the RNAP2.  
230 Not capable of bypassing the UV-lesion, the RNAP2 is stalled or backtracked and paused. This  
231 transcriptional arrest triggers the TCR reaction. When DNA repair is efficiently performed, RNAP2 will  
232 be released from this arrest and transcription will restart. Because this process is highly evocative of  
233 RNAP2 pausing downstream of promoters and CDK9 is involved in the phosphorylation and release  
234 of paused RNAP2 (20), we wanted to investigate whether during TCR, RNAP2 was specifically  
235 phosphorylated. We examined Serine2, Serine5 and Serine7 RNAP2 phosphorylation (21, 22) after  
236 UV irradiation in WT cells, 2 and 4 hours after UV-irradiation by western blot of nuclear extract, in  
237 this way no crosslink, which could interfere with the accessibility of the epitope (23), has been  
238 performed. While there was no difference in Serine5 and Serine7 RNAP2 phosphorylation after UV  
239 irradiation, a well-defined increase in Serine2 RNAP2 phosphorylation was observed 2 hours after  
240 UV-damage induction (Fig 4A). Interestingly, in CSB knocked down cells, this specific Ser2 RNAP2

241 phosphorylation was abolished (Fig 4B and 4C), showing that this phosphorylation is indeed specific  
242 for TCR reactions. Surprisingly, CDK9 depleted cells presented a normal Ser2 RNAP2 phosphorylation  
243 2 hours after UV-irradiation (Fig 4D and 4E), demonstrating that CDK9 is not the kinase responsible  
244 for this phosphorylation. Because CDK12 can replace CDK9 for Ser2 phosphorylation (16, 24), we  
245 investigated whether the kinase activity of CDK12 could be responsible for this specific TCR Ser2  
246 RNAP2 phosphorylation. CDK12 knocked down cells were irradiated and Ser2 RNAP2  
247 phosphorylation was quantified 2 hours after UV. Surprisingly, a reduction of CDK12 does not affect  
248 this TCR-specific RNAP2 phosphorylation (Fig 4F and 4G). To confirm this result we quantified the  
249 TCR-dependent Ser2 RNAP2 phosphorylation in cells depleted for the different Cyclins associated  
250 with both CDK9 and CDK12: Cyclin K, CyclinT1, Cyclin T2, Cyclins T1/T2. Our results show that none of  
251 these Cyclins are associated with the TCR-specific Ser2 RNAP2 phosphorylation (Fig S5). Obviously,  
252 also in these experiments quantifications were normalized to the undamaged condition to be able to  
253 highlight exclusively the role of these kinases and cyclines after UV irradiation during the TCR  
254 reaction.

255

#### 256 *CDK9 increases the mobility of RNAP2 after UV-irradiation.*

257 Because the kinase activity of CDK9 is not involved in the phosphorylation of RNAP2 during  
258 TCR, but having established that CDK9 plays a role in RTR (Fig 1), we planned to investigate whether  
259 the absence of CDK9 would affect the mobility of the RNAP2 during the repair reaction. In order to  
260 answer this question, we produced a plasmid expressing a GFP-tagged version of RNAP2 (Fig S6A)  
261 and stably transfected WT cells. We could show that the GFP-Pol2 is localized in the nucleus of cells  
262 and excluded from the nucleolus, as endogenous RNAP2 (Fig S6B). The GFP-Pol2 fusion protein is  
263 overexpressed in the overall population of cells (Fig S6C) and for this reason just low expressing cells  
264 were chosen to perform the FRAP analysis (Fig S6D). Strip-FRAP assays showed that GFP-Pol2 is  
265 largely immobilized, showing only a limited fraction of recovered protein after the photo-bleach. This  
266 immobile fraction represents the RNAP2 molecules engaged in the process of transcription and

267 therefore retained on the chromatin. In order to verify this transcriptional engagement, we  
268 measured the mobility of RNAP2 after treatment with DRB (5,6-Dichloro-1- $\beta$ -D-  
269 ribofuranosylbenzimidazole), an inhibitor of RNAP2 transcription. After treatment, the immobile  
270 fraction of GFP-Pol2 was reduced, indicating that the majority of GFP-Pol2 molecules are engaged  
271 towards the transcription process (Fig S6E).

272 To investigate the mobility of RNAP2 during RTR, we carried out Strip-FRAP experiments on  
273 GFP-Pol2 expressing cells in presence or absence of UV damage. As already observed in a previous  
274 study in our group (8), there is no measurable change of the mobility of GFP-Pol2, after UV damage  
275 (Fig 5A). This is explained by the fact that the majority of the RNAP2 immobile fraction is due to GFP-  
276 Pol2 molecules involved in transcription and that no additional measurable immobile fraction comes  
277 from lesion-stalled RNAP2 molecules.

278 However, in the absence of CDK9 and in the absence of DNA damage, the RNAP2 immobile  
279 fraction increases (Fig 5B). This result is probably due to the higher retention of RNAP2 molecules on  
280 transcriptional paused sites at proximal promoters, since CDK9 is essential for the RNAP2 release of  
281 paused sites and RNAP2 engagement in productive transcription elongation (25). The absence of  
282 CDK9, in combination with UV damage, results in an even more significant RNAP2 immobile fraction  
283 (Fig 5C), indicating that there are more RNAP2 molecules retained on the chromatin (molecules  
284 stalled on UV-lesions), additionally to the ones observed by default at the pausing sites.

285

## 286 Discussion

287 Bulky DNA-damage distorting the DNA helix, challenges constantly cell survival by interfering and  
288 blocking cellular functions, such as replication and transcription. During evolution, cells have  
289 developed processes that counteract the deleterious effect of these damages, restoring an  
290 undamaged DNA molecule and allowing the restart of cellular processes. The importance of rapidly  
291 restoring cellular functions is better demonstrated by the existence of DNA repair processes tightly  
292 coupled with RNAP2 transcription. When bulky DNA damages, such as ultraviolet lesions, are located  
293 on the transcribed strand of active genes, RNAP2 is stalled and transcription elongation is blocked.  
294 This pausing of transcription is necessary to allow the repair machineries to be recruited on the site  
295 of damage for the repair reaction to take place. Once the repair is completed, RNAP2 pausing may be  
296 released and transcription may restart.

297 During transcription and in absence of any DNA damage, RNAP2 naturally pauses at promoter-  
298 proximal sites, 30 to 60 nucleotides downstream of transcription start site (16). The release of this  
299 pausing into productive transcription elongation is under the control of P-TEFb, a heterodimeric  
300 cyclin-dependent kinase composed of CDK9 and CycT1/CycT2 (26). Because CDK9 interacts tightly  
301 with ELL and it has been demonstrated that ELL is involved in the RTR and is recruited to the damage  
302 via Cdk7 (8), we wondered whether CDK9 could play a role in RTR and more importantly, if RTR  
303 would share a common molecular mechanism with the release of RNAP2 promoter-proximal pausing.  
304 In this article, our effort was focused on decrypting the role of CDK9 during RTR, since as well as for  
305 ELL (8), reduction of CDK9 concentration in CDK9-knocked down cells severely delays the RTR process  
306 without affecting the repair reaction *per se* (Fig1). In order to exclusively investigate the effect of  
307 CDK9 reduction during TCR, we always normalized our results to the undamaged condition in which  
308 we measured that a 30% CDK9 reduction (obtained with several combinations of siRNAs) results in a  
309 70% reduction of basal transcription activity. To investigate CDK9 action on damaged chromatin, we  
310 produced a GFP-labeled version of CDK9 and we quantified the mobility of CDK9-GFP before and  
311 after UV by Fluorescence Recovery After Photo-bleaching (FRAP) assays. During Nucleotide Excision

312 Repair, repair proteins are partially and temporally immobilized on the damaged site and this  
313 dynamic behavior influences the FRAP curves before and after UV irradiation. Namely, repair  
314 proteins mobility is slower after UV damage XPA (27). ELL was found to behave as a canonical repair  
315 protein, and the immobile fraction observed after DNA repair as well as the immobilization on a  
316 locally damaged area was comparable to the one measured for TCR-specific proteins, such as CSA (8).  
317 Surprisingly, CDK9 presented a different dynamic behavior after UV irradiation, instead of being  
318 more immobile, FRAP curves pointed towards a remobilization of the protein. More remarkably, this  
319 remobilization was CSB-dependent. To be able to fine-tune RNAP2 pause release, CDK9 kinase  
320 activity is kept under tight control by its interaction with a large inhibiting complex (7SK snRNP)(26).  
321 Indeed, activation of the CDK9/CycT implies a release from 7SK snRNP and in particular the  
322 dissociation from the P-TEFb inhibitor protein HEXIM1 (18). After UV irradiation, the increased  
323 mobility measured by FRAP analysis for CDK9 is concomitant with the dissociation of CDK9/CycT from  
324 HEXIM1 (Fig 2 and Fig 6). Surprisingly, after UV-irradiation in CSB mutant cells and CSB knocked-  
325 down cells, cellular CDK9-CycT amount is reduced. This novel observation points to a possible direct  
326 or indirect role of CSB in stabilizing the CDK9/CycT complex on the damaged site. In the absence of  
327 CSB, this stabilization is likely not achievable and the CDK9/CycT complex is degraded (Fig 3 and Fig  
328 6C, after UV without CSB). During TCR, it has been proposed that RNAP2 would backtrack and remain  
329 in the proximity of the damaged site to restart transcription or that RNAP2 would detach from  
330 chromatin and restart transcription from the promoter (28). It is not excluded that these processes  
331 could in fact coexist depending on the site of damage (i.e. RNAP2 stalled at a lesion proximal to  
332 initiation or termination would be more prone to disengage from the DNA) or the time it takes for  
333 the repair (i.e. longer repair timing could lead to RNAP2 disengagement). In both cases (at the site of  
334 damage or at the promoter), RNAP2 needs to restart the transcription and this step requires  
335 phosphorylation of the CTD at one of the Serines (2, 5 or 7). We could show here that, after UV-  
336 irradiation, hence during TCR-RTR, RNAP2 is strongly phosphorylated at Ser2. This Ser2  
337 phosphorylation is specifically observed 2 hours after UV irradiation and is less abundant at 4 hours

338 after irradiation. More interestingly, this Ser2 phosphorylation is specifically observed in TCR-  
339 proficient cells but absent, or greatly reduced, in TCR-deficient cells (Fig 4), demonstrating that  
340 RNAP2 Ser2 phosphorylation is the one specifically needed for the restart of transcription after  
341 completion of repair. Surprisingly, we could demonstrate that CDK9 (nor CDK12) is not the kinase  
342 that is in charge for this phosphorylation, which still takes place in CDK9 depleted cells (Fig 4 and Fig  
343 6). This result was unexpected as it shows that the complex CDK9/CycT plays a different role in RTR  
344 than it has in the release of pausing at proximal promoters.

345 Because CDK9 reduction has a clear effect on the timing of the restart of transcription after DNA  
346 repair achievement (Fig 1) but has no kinase activity on RNAP2 (Fig 4), we explored the effect of the  
347 absence of CDK9 on the mobility of RNAP2 molecules. In CDK9 knocked down cells and without any  
348 damage, more RNAP2 molecules are binding to the chromatin. This result is in accordance with the  
349 function of CDK9 during release of pausing, i.e. in its absence more RNAP2 molecules are paused on  
350 proximal promoters. However, after UV irradiation, an even further RNAP2 immobile fraction is  
351 observed in CDK9 knocked down cells, supporting the hypothesis that without CDK9, RNAP2 is more  
352 bound to the damaged chromatin and that the release of RNAP2 is impeded or at least retarded (Fig  
353 5). Interestingly, in our previous study, we observed that this increased RNAP2 immobile fraction is  
354 also observed when cells are ELL-depleted (8). This result could suggest that ELL and CDK9 would play  
355 a structural role during RTR, facilitating other proteins to be either recruited or stimulated in their  
356 function of restarting transcription after completion of DNA repair. In conclusion, the role and  
357 mechanism of action of CDK9 is specific during RTR (Fig 6B, after UV) and is different from its  
358 function in the release of paused RNAP2 (Fig 6A, without UV), indicating that although RTR and  
359 pausing might share common actors, the mechanism of action of RTR is unexpected and remains to  
360 be fully explored, starting from finding the kinase that is responsible for the specific RNAP2 Ser2  
361 phosphorylation.

362

363

## 364 **Materials and Methods**

### 365 **Cell culture**

366 Cell strains used were: (i) wild type SV40-immortalized human fibroblasts (MRC5-SV); (ii) MRC5-SV  
367 stably expressing GFP-Pol II (G418 selected- 0.2 mg/ml); (iii) MRC5-SV stably expressing CDK9-GFP  
368 (G418 selected- 0.2 mg/ml); (iv) CSB deficient SV40-immortalized human fibroblasts (CS1AN, TCR-  
369 deficient); (v) MRC5-SV stably expressing CSA-GFP (G418 selected- 0.2 mg/ml) (vi) XPC deficient  
370 SV40-immortalized human fibroblasts (XP4PA, GGR-deficient). Human fibroblasts were cultured in a  
371 1:1 mixture of Ham's F10 and DMEM (Lonza) supplemented with antibiotics (penicillin and  
372 streptomycin) and 10% fetal calf serum, at 37°C and 5% CO<sub>2</sub>.

373

### 374 **Specific treatment**

375 DNA damage was inflicted by UV-C light (254 nm, 6W lamp). For UV survival experiments, cells were  
376 exposed to different UV-C doses, 1 day after plating. Survival was determined by clone counting, 10  
377 days after UV irradiation, as described previously (29). For FRAP, RRS, and UDS experiments, cells  
378 were globally irradiated with 16 J/m<sup>2</sup> of UV-C and 10J/m<sup>2</sup> for immunoblot experiment whereas for  
379 TCR-UDS, cells were locally irradiated with 100 J/m<sup>2</sup> m of UV-C through a 5- $\mu$ m-pore polycarbonate  
380 membrane filter (Millipore).

381 GFP-Pol2 expressing cells were treated with 100  $\mu$ g/ml of 5,6-dichloro-1-beta-D-  
382 ribofuranosylbenzimidazole (DRB, sigma) for 2h at 37°C before FRAP analysis.

383

### 384 **Construction and expression of GFP-Pol 2 and CDK9-GFP fusion protein**

385 Full length RNAP2 c-DNA was cloned in-frame into pEGFP-C1 vector and full length CDK9 c-DNA was  
386 cloned in-frame into pEGFP-N1 vector (Clontech). Constructs were sequenced prior to transfection.  
387 Transfection in MRC5-SV40 transformed human fibroblasts was performed using Fugene transfection  
388 reagent (Roche). Stably expressing cells were isolated after selection with G418 (Gibco) and single  
389 cell sorting using FACS (FACScalibur, Beckton Dickinson).



390

### 391 **Fluorescence Recovery after Photobleaching (FRAP)**

392 FRAP experiments were performed as described before (17) on a Zeiss LSM 710 NLO confocal laser  
393 scanning microscope (Zeiss), using a 40x/1.3 oil objective, under a controlled environment (37°C, 5%  
394 CO<sub>2</sub>). Briefly, a narrow region of interest (ROI) centred across the nucleus of a living cell was  
395 monitored every 20 (1% laser intensity of the 488 nm line of a 25 mW Argon laser) until the  
396 fluorescence signal reached a steady state level (after circa 2 s). The same strip was then  
397 photobleached for 20 ms at 100% laser intensity. Recovery of fluorescence in the strip was then  
398 monitored (1% laser intensity) every 20 for about 20 seconds. Analysis of raw data was performed  
399 with the ZEN software (Zeiss). All FRAP data were normalized to the average pre-bleached  
400 fluorescence after background removal. Every plotted FRAP curve is an average of at least twenty  
401 measured cells.

402

### 403 **Laser micro-irradiation**

404 In order to locally induce DNA damage in living cells, we used a tuneable near-infrared pulsed laser  
405 (Cameleon Vision II, Coherent Inc.) directly coupled to an inverted confocal microscope equipped  
406 with a 40x/1.3 oil objective and a thermostatic chamber maintained at 37°C with 5% CO<sub>2</sub> (LSM 710  
407 NLO, Zeiss). Typically, a small circular area (3 µm in diameter) within the nucleus of a living cell was  
408 targeted 3 times to 15% of the laser (800 nm). Subsequent time-lapse imaging of targeted cells was  
409 performed every 15s for 420s. Image analysis was performed using ImageJ (Rasband, W.S., National  
410 Institutes of Health, USA) and a custom-built macro as follows: (i) the time series image stack was  
411 adjusted to compensate for cell movement (StackReg plugin), (ii) a ROI spanning the total nucleus  
412 was defined to compensate for unwanted photobleaching during the acquisition of images, (iii) a  
413 'local damage' ROI was specified to quantify the fluorescence increase due to (GFP tagged) protein  
414 recruitment at the laser induced DNA damage area. At least ten cells were measured for all cell lines.

415

416 **RNA interference**

417 Short interfering RNAs (siRNAs) used in this study are pool of siRNA and are: siMock, Dharmacon D-  
418 001810-01 (10 nM); siCDK9, Dharmacon L-003243-00 (10 nM); siCDK12, Sanatcruz sc-44343 (5 nM);  
419 siCSB, Dharmacon L-004888-00 (10 nM) ; siCyclinK, Dharmacon L-029590-00 (10 nM) ; siCyclinT1,  
420 Dharmacon L-003220-00 (10 nM) ; siCyclinT2, Dharmacon L-003221-00 (10 nM) ; siXPF, Dharmacon  
421 M-019946-00 (10 nM). In parenthesis, the final concentration used for each siRNA. Cells were  
422 transfected with siRNA using GenJET siRNA transfection reagent (Tebu-Bio) according to the  
423 manufacturer's protocol. Briefly, 100.000 cells were seeded per wells of a 6-wells plates and allowed  
424 to attach overnight. Transfection complexes were formed by 15 min incubation at room temperature  
425 using buffer provided and added 24h after seeding. A second siRNA transfection was performed 24h  
426 after the 1<sup>st</sup> and cells were grown confluent. Experiments were carried out 48h after the 1<sup>st</sup> siRNA  
427 transfection. Proteins knock down was confirmed by western blot.

428

429 **Protein extraction**

430 For protein extraction, cells were cultured either in a 10-cm dishes or in 6-wells plates if cells need to  
431 be transfected with siRNA. After irradiation as described above, cells were harvested by Trypsination.  
432 The extraction of proteins has been performed by using either the kit CellLyctic™ NuCLEAR™ Extraction  
433 (Sigma-Aldrich) for nuclear extract or the kit Mammalian Cell Lysis Reagent™ (Sigma-Aldrich) for total  
434 protein extraction. The concentration of proteins has been determined by using the Bradford  
435 method. Then, samples were diluted with 2X Laemmli buffer, heated at 95°C and loaded on a SDS-  
436 PAGE gel.

437

438 **Co-immunoprecipitation**

439 For co-immunoprecipitation, 10µl of protein G magnetic bead (Bio-adembead, Ademtech) were used  
440 par IP. 1µg of anti-HEXIM1 antibodies (rabbit, A303-113A, Béthyl) were bound to the beads in PBS  
441 with BSA (5mg/ml) during 2h at 4°C with rotation. 200µg of whole cell extract were then incubated

442 with beads-antibodies complex for 2h at 4°C with rotation. After 2 washes at 100mM salt, 2 washes  
443 at 150mM and 1 wash at 100mM, beads were boiled in 2x Laemmli buffer and loaded on a SDS-  
444 PAGE gel.

445

#### 446 **SDS-PAGE**

447 Proteins were separated on SDS-PAGE composed of bisacrylamide (37:5:1), blotted onto a  
448 polyvinylidene difluoride membrane (PVDF, 0.45µm Millipore) and analysed using the following  
449 primary antibodies: anti-Serine2 phosphorylation RNAP2 (rabbit, ab5095 Abcam); anti-Serine5  
450 phosphorylation RNAP2 (rabbit, #13523, cell signalling); anti-Serine7 phosphorylation RNAP2 (rabbit,  
451 #13780, cell signalling); anti-RNAP2 (rabbit, sc-899 Santa Cruz Biotechnology); anti-CDK9 (rabbit, sc-  
452 8338X Santa Cruz Biotechnology); anti-CSB (goat, sc10459 Santa Cruz Biotechnology); anti-CyclinK  
453 (rabbit, ab57311, abcam); anti-CyclinT1 (rabbit, sc-10750 Santa Cruz Biotechnology); anti-CyclinT2  
454 (mouse, ab50979, abcam); anti-HEXIM1 (rabbit, A303-113A, Bethyl); anti- $\alpha$ -tubulin (mouse, T6074,  
455 sigma-aldrich); anti-UBF (mouse, sc-13125 Santa Cruz Biotechnology) and anti-TBP (mouse, 3TF1-  
456 3G3, ThermoFisher). The loading was controlled with either the anti-UBF, anti-TPB or anti- $\alpha$ -tubulin  
457 antibody. Western blot process was performed as described previously (Rockx et al. 2000) and  
458 protein bands were visualised via chemiluminescence (ECL Enhanced Chemo Luminescence; Pierce  
459 ECL Western Blotting Substrate) using Horseradish Peroxidase (HRP)-conjugated secondary  
460 antibodies and imaged via the chemidoc system (BioRad). The quantification of the band was  
461 performed with the software Image Lab (BioRad) using the method of volumes (rectangle). The  
462 background was removed with the Local subtraction method.

463

#### 464 **Recovery of RNA synthesis (RRS) assays.**

465 MRC5-SV40 cells were grown on 24 mm coverslips. siRNA (siCDK9/siCSB) transfections were  
466 performed 24h before RRS assays. RNA detection was performed using a Click-iT RNA Alexa Fluor  
467 Imaging kit (Invitrogen), according to the manufacturer's instructions. Briefly, cells were UV-C

468 irradiated ( $16 \text{ J/m}^2$ ) and incubated for 0, 3, 16 and 24 h at  $37^\circ\text{C}$ . Then, cells were incubated for 2  
469 hours with 5-ethynyl uridine, fixed and permeabilized. Cells were incubated for 30 min with the Click-  
470 iT reaction cocktail containing Alexa Fluor Azide 488. After washing, the coverslips were mounted  
471 with Vectashield (Vector). Images of the cells were obtained with the same setup (see FRAP methods  
472 section) and constant acquisition parameters, then the average fluorescence intensity per nucleus  
473 was estimated after background subtraction (using ImageJ) and normalized to not treated cells. For  
474 each sample, at least 80 nuclei were analysed from three independent experiments.

475

#### 476 **Unscheduled DNA synthesis (UDS) assays.**

477 MRC5-SV40 cells were grown on 24 mm coverslips. siRNA (siCDK9/siXPF) transfections were  
478 performed 24h before UDS assays. *De novo* DNA synthesis detection was performed using a Click-iT  
479 DNA Alexa Fluor Imaging kit (Invitrogen), according to the manufacturer's instructions. Briefly, after  
480 global irradiation cells were incubated for 3 hours with 5-ethynyl-2'-deoxyuridine (EdU), then cells  
481 are washed with PBS, fixed and permeabilized. Fixed cells were incubated for 30 min with the Click-iT  
482 reaction cocktail containing Alexa Fluor Azide 594. After washing, the coverslips were mounted with  
483 Vectashield containing DAPI (Vector). Images of the cells were acquired being careful not to take cells  
484 in replication. Images were analysed in the same way as for the RRS assay (see previous paragraph).  
485 For each sample, at least 20 nuclei were analysed from three independent experiments.

486

#### 487 **TCR-UDS assays: UDS measurement during TCR**

488 XPC deficient SV40-immortalized human fibroblasts (XP4PA-GGR deficient cell line), were grown on  
489 24 mm coverslips. siRNA (siCDK9/siXPF) transfections were performed 24h before UDS assays. After  
490 local irradiation ( $100 \text{ J/m}^2$  UV-C) through a  $5 \mu\text{m}$  pore polycarbonate membrane filter, cells were  
491 incubated for 8 hours with ethynyldeoxyuridine, washed, fixed and permeabilized. Fixed cells were  
492 treated with a PBS-blocking solution (PBS+: PBS containing 0.15% glycine and 0.5% bovine serum  
493 albumin) for 30 min, subsequently incubated with primary antibodies mouse monoclonal anti- $\gamma\text{H2AX}$

494 (Ser139) (Upstate, clone JBW301) 1/500 diluted in PBS+ for 1h, followed by extensive washes with  
495 Tween20 in PBS. Cells were then incubated for 1h with secondary antibodies conjugated with Alexa  
496 Fluor 488 fluorescent dyes (Molecular Probes, 1:400 dilution in PBS+). Then, cells were incubated for  
497 30 min with the Click-iT reaction cocktail containing Alexa Fluor Azide 594. After washing, the  
498 coverslips were mounted with Vectashield containing DAPI (Vector). Images of the cells were  
499 obtained with the same microscopy system and constant acquisition parameters. Images were  
500 analysed using ImageJ as follows: (i) a ROI outlining the locally damaged area was defined by using  
501 the  $\gamma$ H2AX staining, (ii) a second ROI of comparable size was defined in the nucleus (avoiding nucleoli  
502 and other non-specific signals) to estimate background signal, (iii) the 'local damage' ROI was then  
503 used to measure the average fluorescence correlated to the EdU incorporation, which is an estimate  
504 of DNA replication after repair once the nuclear background signal obtained during step (ii) is  
505 subtracted. For each sample, between 50 and 60 nuclei were analysed from three independent  
506 experiments.

507

### 508 **Immunofluorescence**

509 Cells were plated in 3.5 cm diameter wells on coverslips 24mm, in order to reach 70% confluency on  
510 the day of the staining. Cells were washed twice in PBS, fixed in 2% paraformaldehyde, permeabilized  
511 two times for 10min with PBS containing 0.1% Triton X-100 (PBS-T) and then washed with PBS  
512 containing 0.15% glycine and 0.5% bovine serum albumin (PBS+). We diluted antibodies in PBS+ and  
513 incubated cells with antibodies for 2 h at room temperature in a moist chamber. Antibodies used  
514 were: anti-CDK9 (rabbit, sc-484 Santa Cruz Biotechnology, 1/500 dilution), anti-RNA Pol II (rabbit, sc-  
515 899 Santa Cruz Biotechnology, 1/500 dilution). After washing (3 times short wash, 2 times for 10 min  
516 each with PBS-T) cells were incubated with the secondary antibody coupled to a fluorochrome: goat  
517 anti-rabbit conjugated with Alexa 488 (A11088 Invitrogen), 1/500 dilution in PBS+. After the same  
518 washing procedure, coverslips were mounted with Vectashield containing DAPI (Vector). Slides have

519 been observed on a fluorescent microscope LSM710 NLO (Zeiss), using an objective 40x/1.3, and the  
520 analysis has been performed using ImageJ (NIH).

521

522

## 523 **Acknowledgments**

524           We are grateful to Nicolas Heddebaut and Amandine Mourcet for the technical help  
525 provided.

526           This work was supported by l'Agence Nationale de la Recherche (ANR DyReCT: ANR-14-CE10-  
527 0009) and the ARC (Association pour la Recherche sur le Cancer) foundation (projet Fondation ARC  
528 PJA 20131200188).

529           L-M.D. and G.S. were supported by l'Agence Nationale de la Recherche (ANR DyReCT: ANR-  
530 14-CE10-0009). A.L. was supported by Association pour la Recherche sur le Cancer (Post-Doc grant).

531 The funders had no role in study design, data collection and analysis, decision to publish, or  
532 preparation of the manuscript.

533

534

## 535 References

- 536 1. Giglia-Mari G, Zotter A, Vermeulen W. DNA damage response. *Cold Spring Harb Perspect*  
537 *Biol.*3(1).
- 538 2. Kraemer KH, Patronas NJ, Schiffmann R, Brooks BP, Tamura D, Digiovanna JJ. Xeroderma  
539 pigmentosum, trichothiodystrophy and Cockayne syndrome: A complex genotype-phenotype  
540 relationship. *Neuroscience*. 2007.
- 541 3. Hanawalt PC. Transcription-coupled repair and human disease. *Science*.  
542 1994;266(5193):1957-8.
- 543 4. Donahue BA, Yin S, Taylor JS, Reines D, Hanawalt PC. Transcript cleavage by RNA polymerase  
544 II arrested by a cyclobutane pyrimidine dimer in the DNA template. *Proc Natl Acad Sci U S A*.  
545 1994;91(18):8502-6.
- 546 5. Fousteri M, Vermeulen W, van Zeeland AA, Mullenders LH. Cockayne syndrome A and B  
547 proteins differentially regulate recruitment of chromatin remodeling and repair factors to stalled  
548 RNA polymerase II in vivo. *Mol Cell*. 2006;23(4):471-82.
- 549 6. Fousteri M, Mullenders LH. Transcription-coupled nucleotide excision repair in mammalian  
550 cells: molecular mechanisms and biological effects. *Cell Res*. 2008;18(1):73-84.
- 551 7. Oksenysh V, Zhovmer A, Ziani S, Mari PO, Eberova J, Nardo T, et al. Histone  
552 methyltransferase DOT1L drives recovery of gene expression after a genotoxic attack. *PLoS Genet*.  
553 2013;9(7):e1003611.
- 554 8. Mourgues S, Gautier V, Lagarou A, Bordier C, Mourcet A, Slingerland J, et al. ELL, a novel  
555 TFIIH partner, is involved in transcription restart after DNA repair. *Proc Natl Acad Sci U S A*. 2013.
- 556 9. Dinant C, Ampatziadis-Michailidis G, Lans H, Tresini M, Lagarou A, Grosbart M, et al.  
557 Enhanced chromatin dynamics by FACT promotes transcriptional restart after UV-induced DNA  
558 damage. *Mol Cell*. 2013;51(4):469-79.
- 559 10. Adam S, Polo SE, Almouzni G. Transcription Recovery after DNA Damage Requires Chromatin  
560 Priming by the H3.3 Histone Chaperone HIRA. *Cell*. 2013;155(1):94-106.
- 561 11. Kong SE, Banks CA, Shilatifard A, Conaway JW, Conaway RC. ELL-associated factors 1 and 2  
562 are positive regulators of RNA polymerase II elongation factor ELL. *Proc Natl Acad Sci U S A*.  
563 2005;102(29):10094-8.
- 564 12. Lin C, Smith ER, Takahashi H, Lai KC, Martin-Brown S, Florens L, et al. AFF4, a component of  
565 the ELL/P-TEFb elongation complex and a shared subunit of MLL chimeras, can link transcription  
566 elongation to leukemia. *Mol Cell*. 2010;37(3):429-37.
- 567 13. Price DH. Poised polymerases: on your mark...get set...go! *Mol Cell*. 2008;30(1):7-10.
- 568 14. Byun JS, Fufa TD, Wakano C, Fernandez A, Haggerty CM, Sung MH, et al. ELL facilitates RNA  
569 polymerase II pause site entry and release. *Nat Commun*. 2012;3:633.
- 570 15. Buratowski S. Progression through the RNA polymerase II CTD cycle. *Mol Cell*.  
571 2009;36(4):541-6.
- 572 16. Bowman EA, Kelly WG. RNA polymerase II transcription elongation and Pol II CTD Ser2  
573 phosphorylation: A tail of two kinases. *Nucleus*. 2014;5(3):224-36.
- 574 17. Giglia-Mari G, Miquel C, Theil AF, Mari PO, Hoogstraten D, Ng JM, et al. Dynamic interaction  
575 of TTDA with TFIIH is stabilized by nucleotide excision repair in living cells. *PLoS Biol*. 2006;4(6):e156.
- 576 18. Kobbi L, Demey-Thomas E, Braye F, Proux F, Kolesnikova O, Vinh J, et al. An evolutionary  
577 conserved Hexim1 peptide binds to the Cdk9 catalytic site to inhibit P-TEFb. *Proc Natl Acad Sci U S A*.  
578 2016.
- 579 19. Yang Z, Zhu Q, Luo K, Zhou Q. The 7SK small nuclear RNA inhibits the CDK9/cyclin T1 kinase to  
580 control transcription. *Nature*. 2001;414(6861):317-22.
- 581 20. Schuller R, Forne I, Straub T, Schreieck A, Texier Y, Shah N, et al. Heptad-Specific  
582 Phosphorylation of RNA Polymerase II CTD. *Mol Cell*. 2016;61(2):305-14.
- 583 21. Hsin JP, Xiang K, Manley JL. Function and control of RNA polymerase II C-terminal domain  
584 phosphorylation in vertebrate transcription and RNA processing. *Mol Cell Biol*. 2014;34(13):2488-98.



- 585 22. Jeronimo C, Collin P, Robert F. The RNA Polymerase II CTD: The Increasing Complexity of a  
586 Low-Complexity Protein Domain. *J Mol Biol.* 2016;428(12):2607-22.
- 587 23. Mayer A, Lidschreiber M, Siebert M, Leike K, Soding J, Cramer P. Uniform transitions of the  
588 general RNA polymerase II transcription complex. *Nat Struct Mol Biol.* 2010;17(10):1272-8.
- 589 24. Bartkowiak B, Liu P, Phatnani HP, Fuda NJ, Cooper JJ, Price DH, et al. CDK12 is a transcription  
590 elongation-associated CTD kinase, the metazoan ortholog of yeast Ctk1. *Genes Dev.*  
591 2010;24(20):2303-16.
- 592 25. Jonkers I, Kwak H, Lis JT. Genome-wide dynamics of Pol II elongation and its interplay with  
593 promoter proximal pausing, chromatin, and exons. *Elife.* 2014;3:e02407.
- 594 26. Nguyen VT, Kiss T, Michels AA, Bensaude O. 7SK small nuclear RNA binds to and inhibits the  
595 activity of CDK9/cyclin T complexes. *Nature.* 2001;414(6861):322-5.
- 596 27. Rademakers S, Volker M, Hoogstraten D, Nigg AL, Mone MJ, Van Zeeland AA, et al.  
597 Xeroderma pigmentosum group A protein loads as a separate factor onto DNA lesions. *Mol Cell Biol.*  
598 2003;23(16):5755-67.
- 599 28. Ghosh-Roy S, Das D, Chowdhury D, Smerdon MJ, Chaudhuri RN. Rad26, the transcription-  
600 coupled repair factor in yeast, is required for removal of stalled RNA polymerase-II following UV  
601 irradiation. *PLoS One.* 2013;8(8):e72090.
- 602 29. Jensen A, Mullenders LH. Transcription factor IIS impacts UV-inhibited transcription. *DNA*  
603 *Repair (Amst).* 2010;9(11):1142-50.
- 604

605

606

FIGURE 1

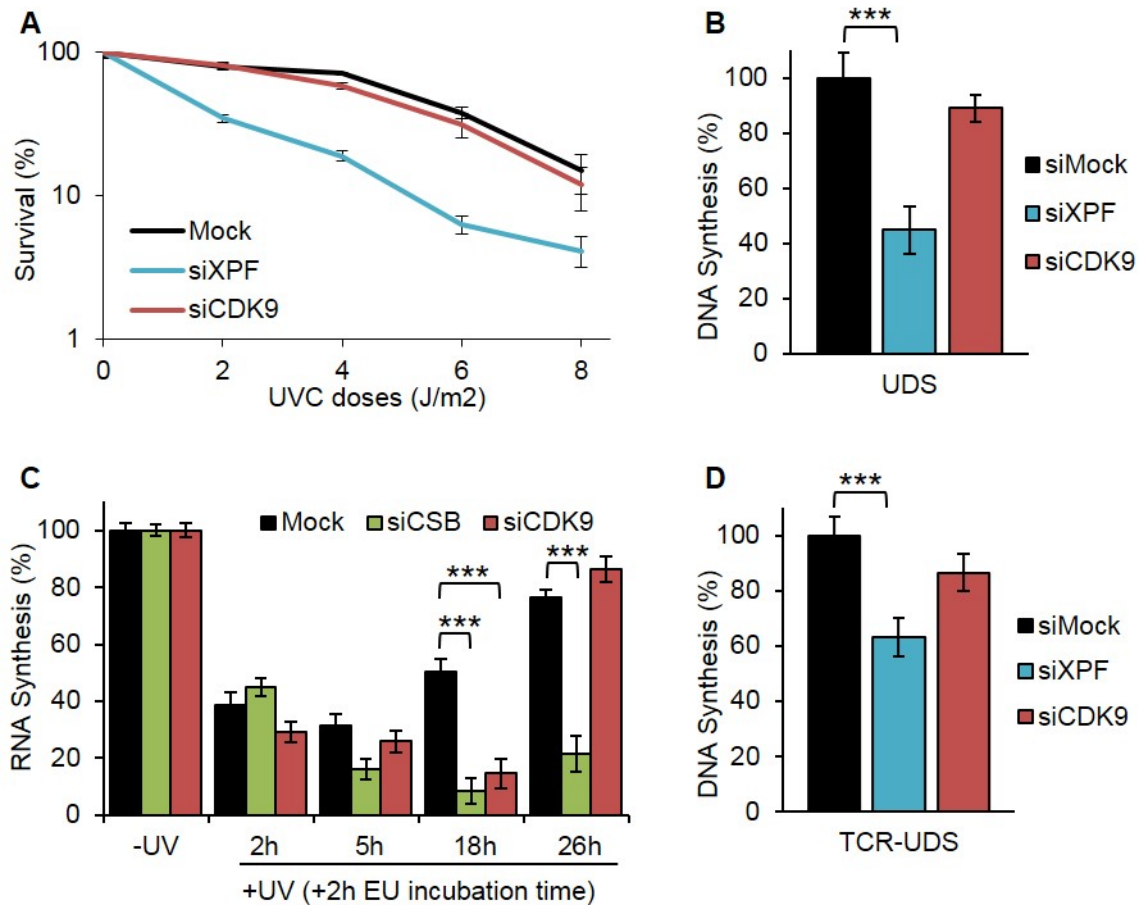

607

608 **Figure 1. CDK9 function in NER**

609 **A** Sensitivity to UV-C of immortalized human fibroblast MRC5 cells treated with siRNA against the  
 610 indicated factors as determined by colony-forming ability. **B** UDS determined by EdU incorporation  
 611 after local UV-C exposure in MRC5 cells after siRNA mediated knockdown of the indicated factors. At  
 612 least 20 nuclei were analyzed. **C** RRS after UV-C exposure in MRC5 cells after siRNA mediated  
 613 knockdown of the indicated factors. At least 60 nuclei were analysed. **D** TCR-UDS determined by EdU  
 614 incorporation after local UV-C exposure in a GGR-deficient cell line (XPC<sup>-/-</sup>) after siRNA mediated  
 615 knockdown of the indicated factors. At least 25 local damages were analysed.

616 For all figures, mock siRNA (black), XPF siRNA (blue), CDK9 siRNA (red), CSB siRNA (green); error bars  
 617 represent the SEM. p-value : \*\*\*<0,001

618

619  
620

FIGURE 2

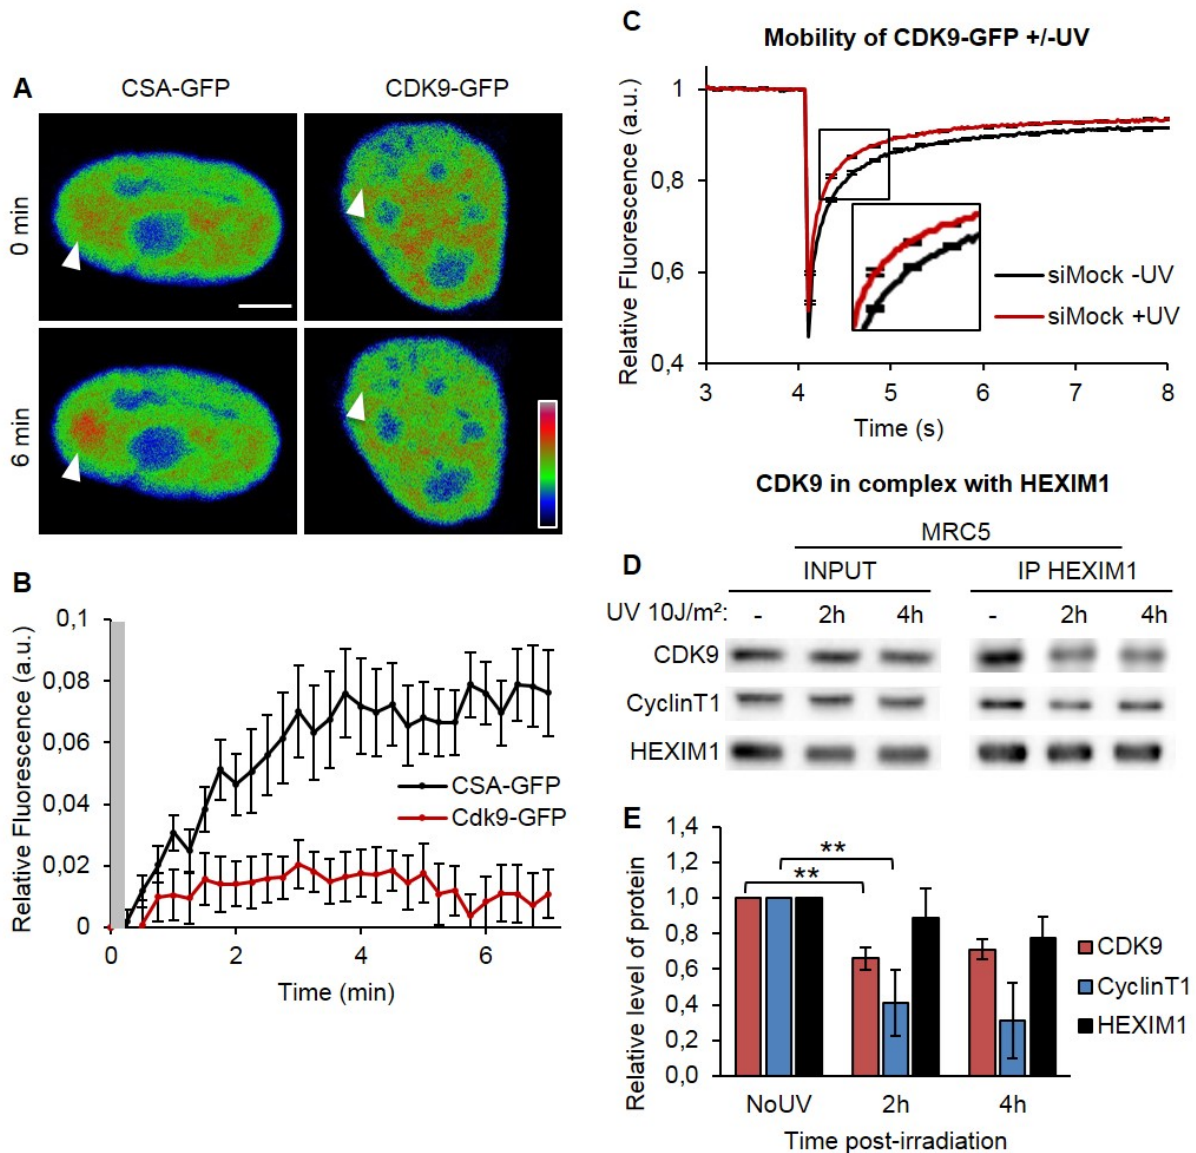

621

622 **Figure 2. CDK9 dynamics during DNA damage response**

623 **A** Confocal time-lapse images of a living mammalian fibroblast expressing CSA-GFP or CDK9-GFP,

624 seen accumulating at a microirradiated area (arrows). Images with rainbow RGB Lookup table. Scale

625 bar = 5 $\mu$ m. **B** Accumulation curves of CDK9-GFP (red line) and CSA-GFP (black line) proteins at laser-

626 induced DNA damage. Hatched region indicates the time window during which microirradiation-

627 induced photobleaching masks the accumulation signal. Error bars represent the SEM obtained from

628 at least 14 cells. **C** Normalized FRAP analysis of CDK9-GFP expressing cells after siRNA mediated

629 knockdown of the indicated factors. Cells were measured untreated (-UV) or 4h after UC-C exposure

630 (+UV). Error bars represent the SEM obtained from at least 27 cells from 2 independent experiments.  
631 p-value between the two curves inferior to 0,001. **D** Immunoprecipitation of HEXIM1 in MRC5 cells.  
632 Bound proteins were revealed by Western blot using antibodies against CyclinT1, CDK9 and HEXIM1.  
633 INPUT corresponds to 20% of the lysate used for IP reactions. **E** Quantification of at least three  
634 different experiments of the IP/INPUT ratio compared with NoUV condition. p-value : \*\*<0,05  
635

636

**FIGURE 3**

637

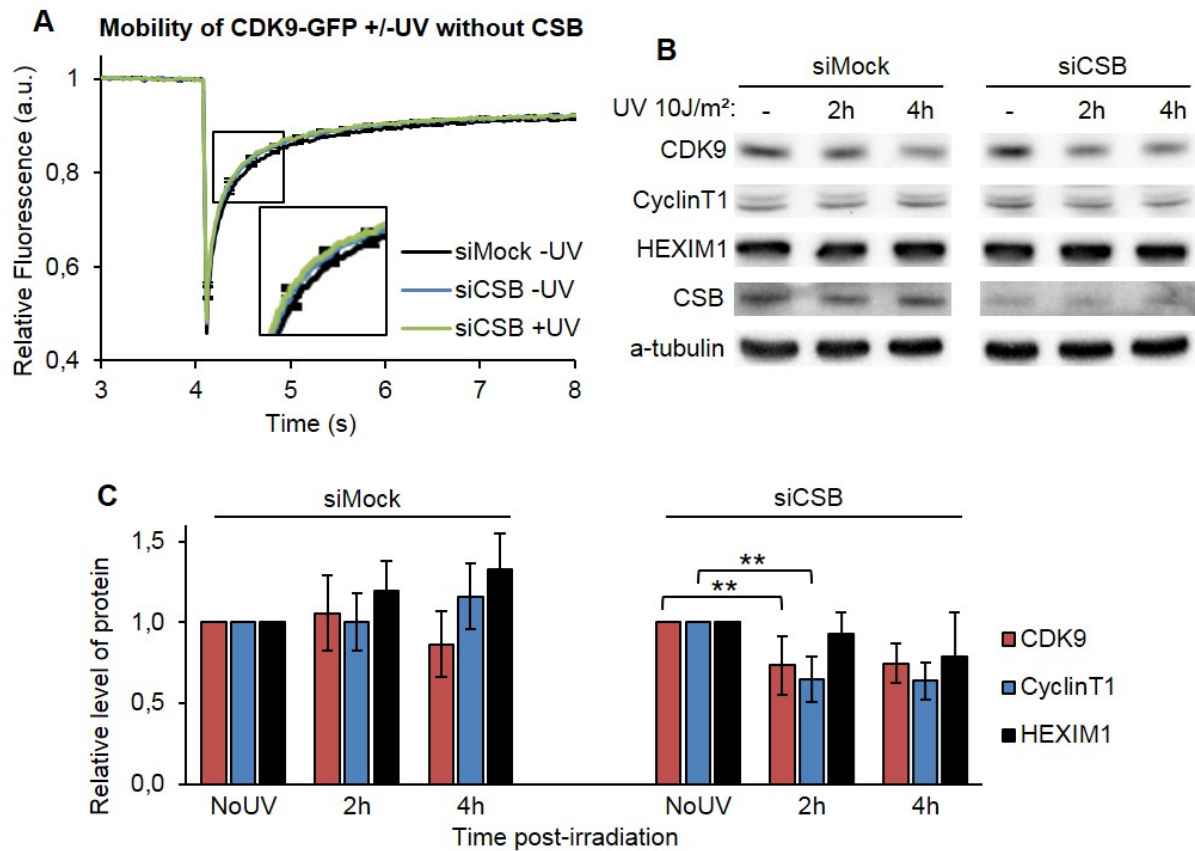

638

**Figure 3. CDK9/CyclinT1 degradation without CSB**

640 **A** Normalized FRAP analysis of CDK9-GFP expressing cells after siRNA mediated knockdown of the  
 641 indicated factors. Cells were measured untreated (-UV) or 4h after UV-C exposure (+UV). Error bars  
 642 represent the SEM obtained from at least 27 cells from 2 independent experiments. **A** Immunoblot  
 643 analysis of CDK9, CyclinT1, HEXIM1 and CSB in MRC5 cells treated with siRNA mediated knockdown  
 644 of the indicated factors followed by different time of irradiation. **B** Quantification of western blot.  
 645 The values of each protein are normalized to no-UV condition.

646

647

648

649

650

FIGURE 4

**Phosphorylation of RNAP2 after UV**

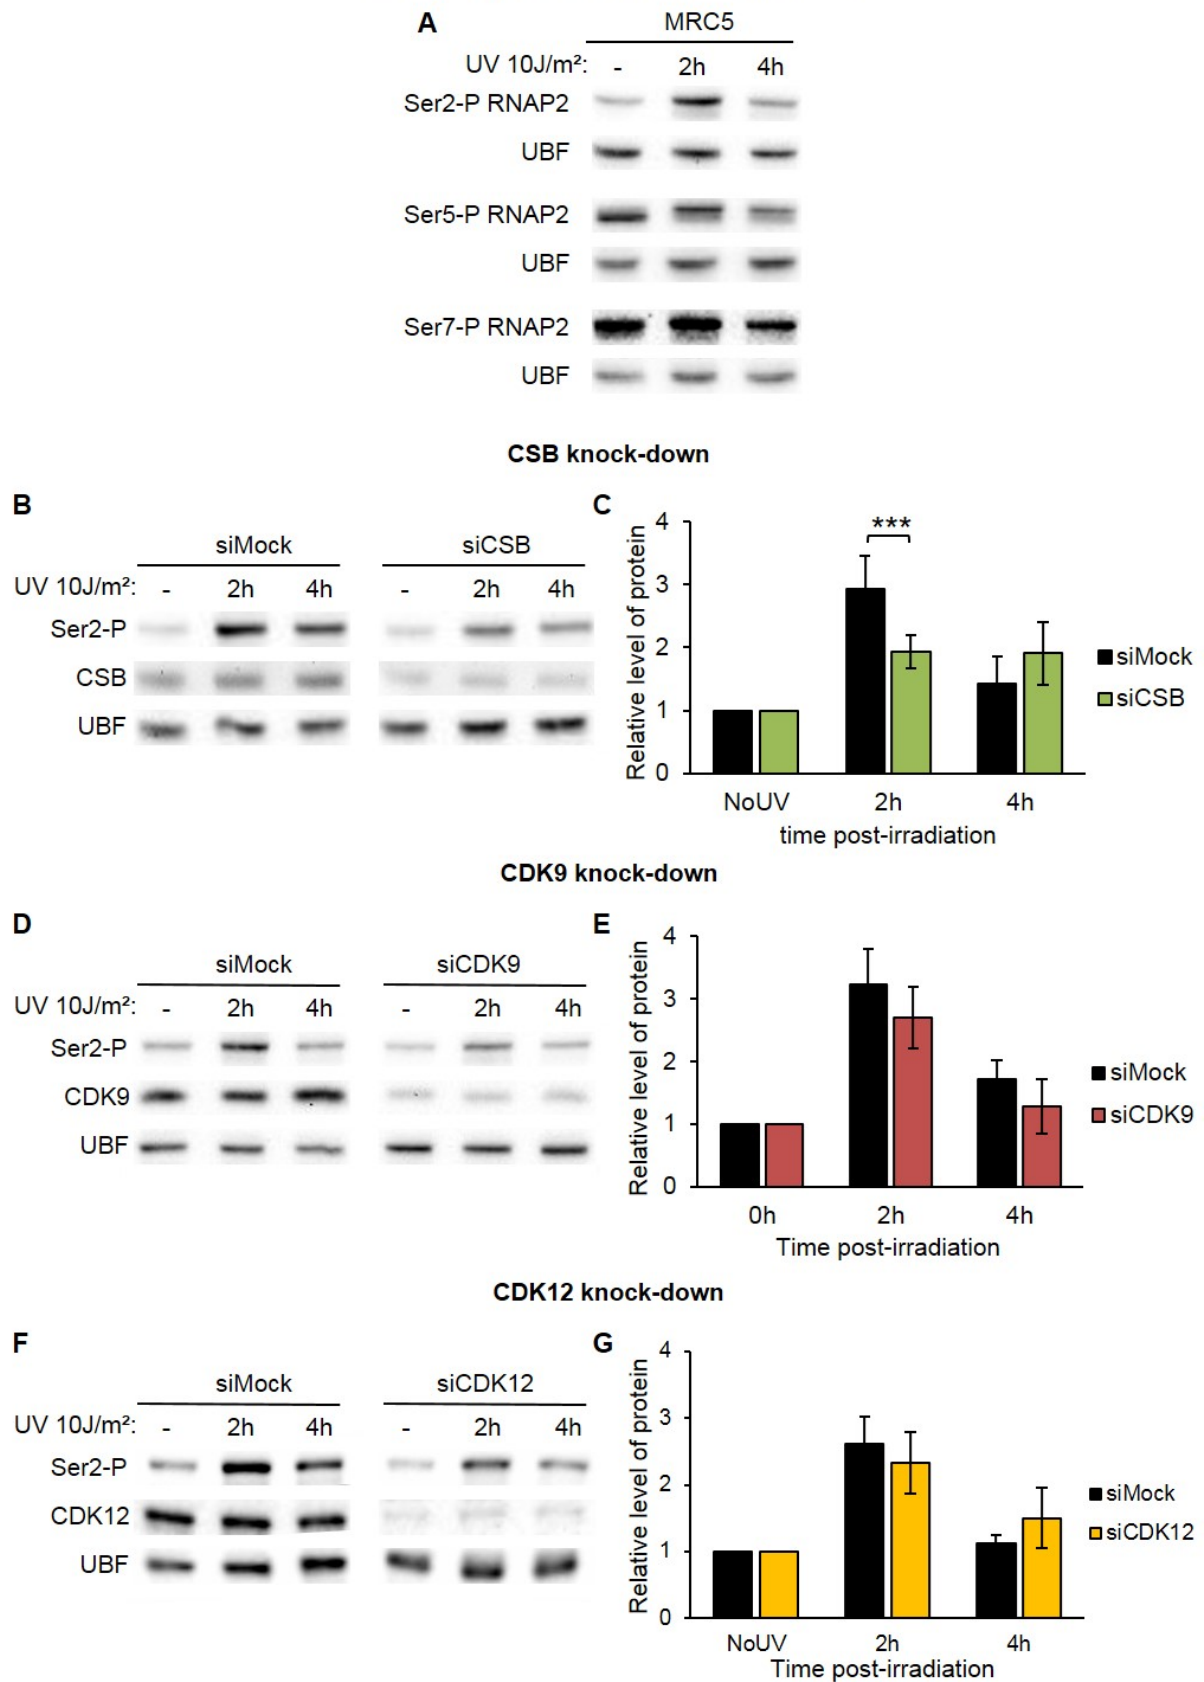

651  
652

653

654 **Figure 4. RNAP2 behavior in transcription restart after DNA damage**

655 **A** Immunoblot showing the phosphorylation of Serine 2, 5 or 7 of RNAP2 in MRC5 whole cell extract  
656 after UV irradiation. **B-D-F** Western blot showing the phosphorylation of Serine 2 in MRC5 nuclear  
657 extract treated or not with UV-C after siRNA mediated knockdown of indicated factors showing the  
658 phosphorylation of Serine 2. UBF serves as a loading control. **C-E-G** Quantification of at least three  
659 different experiments of the RNAP2 phosphorylation/UBF ratio compared with NoUV condition for  
660 each siRNA. p-value : \*\*<0,05.

661

662

FIGURE 5

663

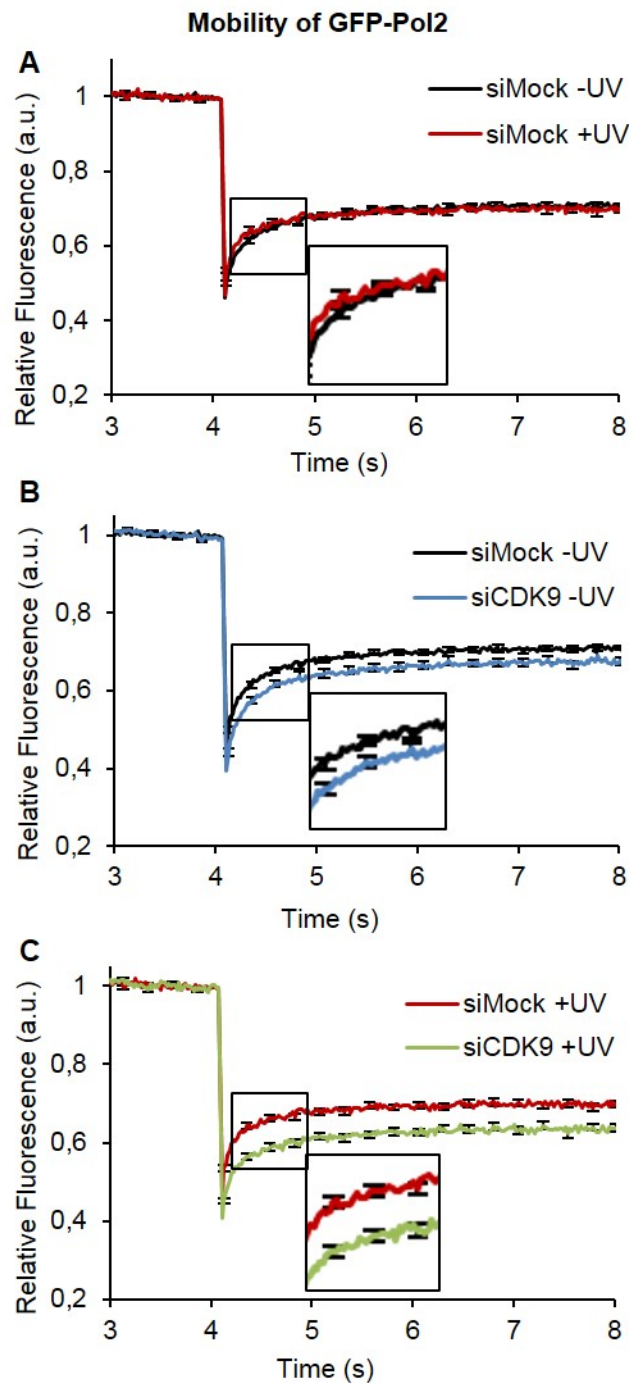

664

665 **Figure 5. CDK9 function in transcription restart after UV damage repair**

666 Normalized FRAP analysis of GFP-Pol2 expressing cells after siRNA mediated knockdown of indicated  
667 factors. Cells were measured untreated (-UV) or 4h after UC-C exposure (+UV). Error bars represent  
668 the SEM obtained from at least 27 cells from 2 independent experiments. p-value : siMock -UV and  
669 siCDK9 -UV < 0,01, siMock +UV and siCDK9 +UV < 0,001.



670

FIGURE 6

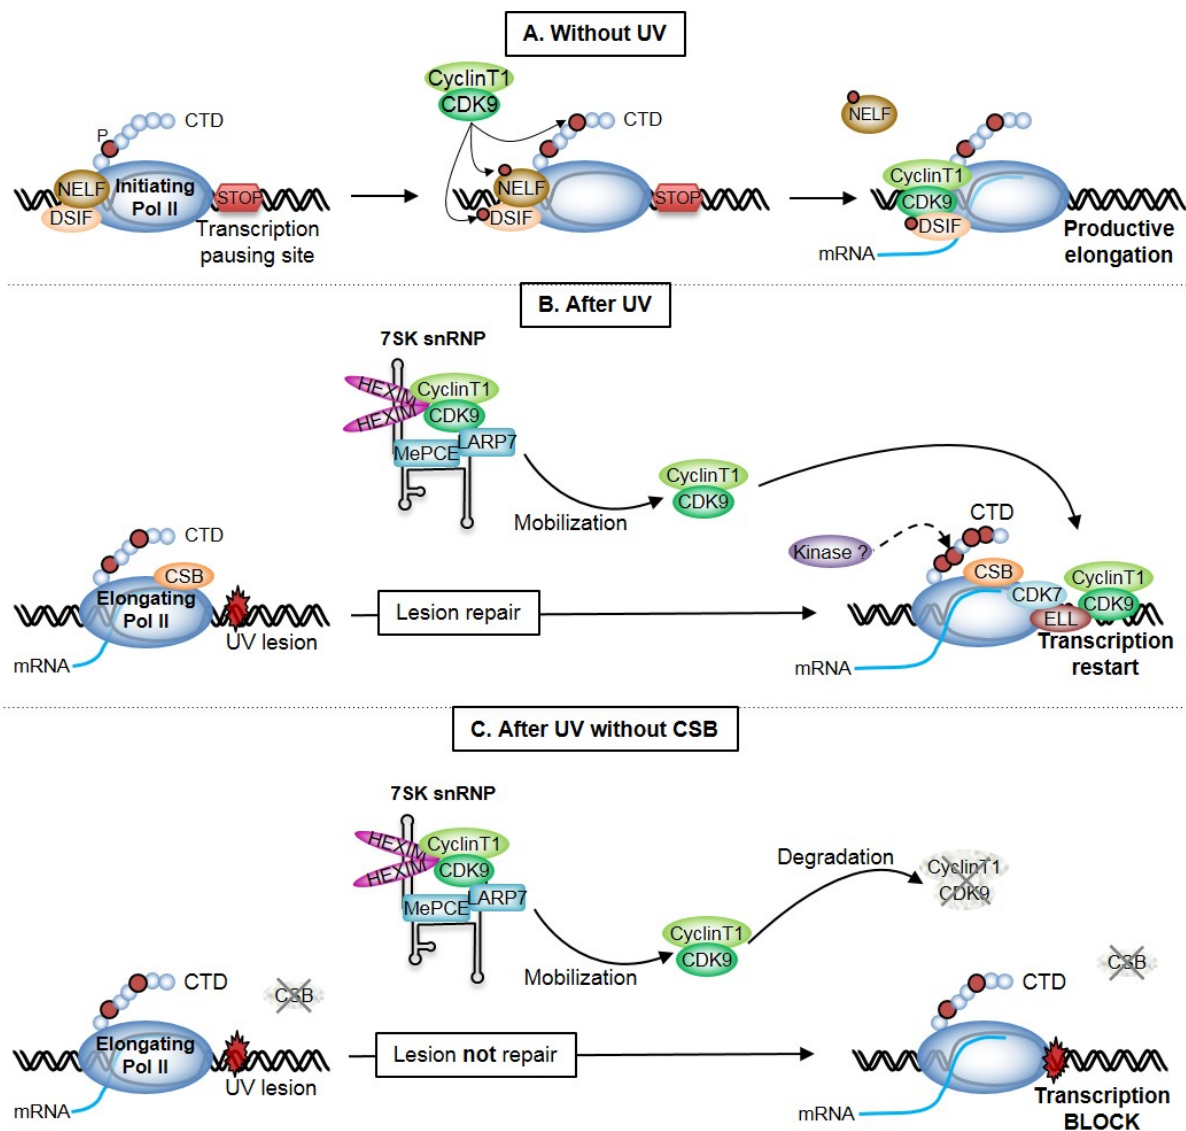

671  
672

673 **Figure 6. Mechanistic model of CDK9's role in transcription restart after DNA repair**

674 **A.** Immediately following initiation, RNAP2 soon enters transcriptional arrest mediated by DSIF and  
 675 NELF. Their negative effect can be relieved by P-TEFb composed of CDK9 and CyclinT. The kinase  
 676 CDK9 phosphorylates (red circle) DSIF and NELF as well as the serine 2 of RNAP2 CTD allowing  
 677 productive elongation. **B.** After UV irradiation, CDK9 and CyclinT is released from 7SK snRNP complex  
 678 and can be recruited to the site of damage probably via its interaction with ELL. After completion of  
 679 the repair reaction (lesion removal and DNA gap filing), CDK9 plays an essential role to enable RNAP2  
 680 restart, probably as a docking protein to recruit additional factors needed for transcription

681 resumption. **C.** Without CSB, lesion is not repaired. CDK9/CyclinT1 is release from 7SK snRNP  
682 complex and without CSB is probably not recruited to the site of damage leading to a rapid  
683 degradation of the CDK9/CyclinT1. Transcription remains blocked.

684

685

686

687

688

689

690

691

692 **Supplementary Figures:**

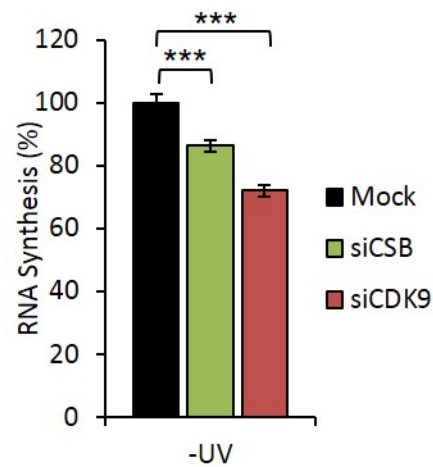

693

694 **Figure S1. Level of RNA synthesis without UV**

695 RNA synthesis in MRC5 cells after siRNA mediated knockdown of the indicated factors. At least 60  
696 nuclei were analysed. Mock siRNA (black), CDK9 siRNA (red), CSB siRNA (green); error bars represent  
697 the SEM. p-value : \*\*\*<0,001.

698

699

700

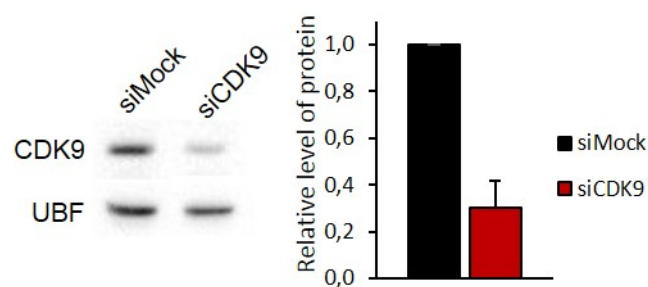

701

702 **Figure S2. CDK9 siRNA efficiency**

703 A Western blot showing the expression of CDK9 in MRC5 nuclear extract after siRNA mediated knock-  
704 down of CDK9. UBF serves as a loading control. B Quantification of at least three different  
705 experiments of CDK9 level normalized to UBF and siCDK9 compared to siMock.

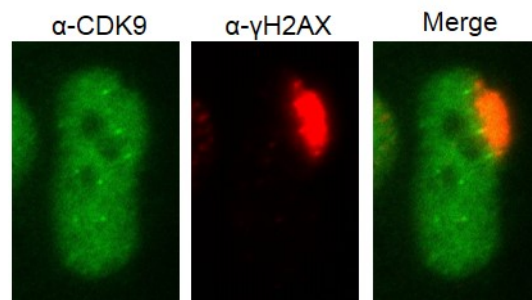

706

707 **Figure S3. No recruitment of CDK9 on Local Damage**

708 Immunofluorescence staining of MRC5sv cells with an anti-CDK9 and an anti- $\gamma$ H2AX antibody 3h after  
709 local damage induction with UV-C.

710

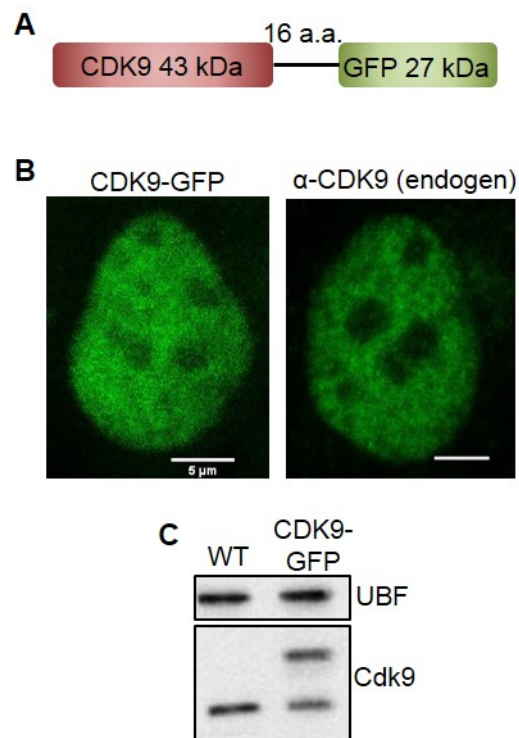

711

712 **Figure S4. Characterization of stably expressing CDK9-GFP cell lines**

713 **A** Scheme of the CDK9-GFP fusion protein **B** Confocal images of CDK9-GFP expressing cell lines and  
714 immunofluorescence staining of MRC5sv cells with a primary antibody against CDK9 **C** Immunoblot  
715 probed with an anti-CDK9 antibody of WT MRC5 cells and MRC5 cells stably expressing CDK9-GFP.  
716 UBF serves as a loading control.

## Phosphorylation of RNAP2 after UV

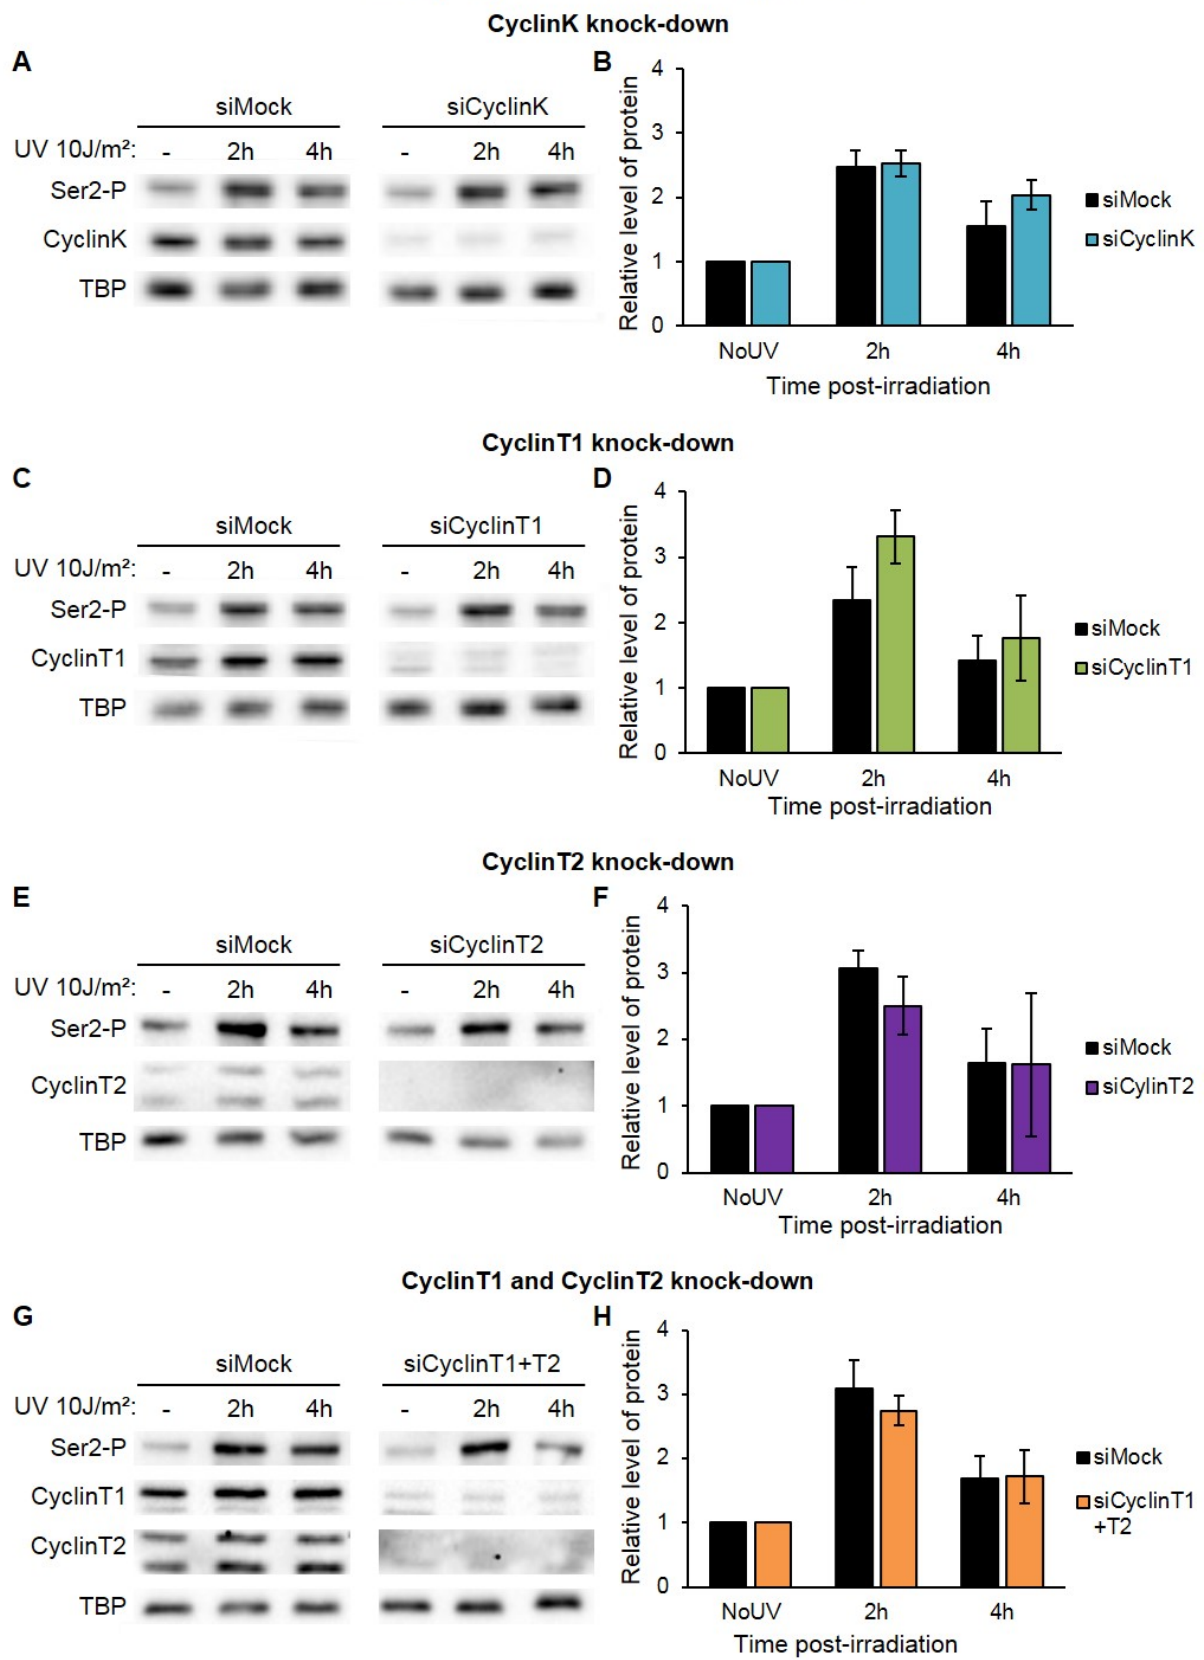

717

718 **Figure S5. RNAP2 serine 2 phosphorylation without Cyclin proteins of CDK9.**

719 **A-C-E-G** Western blot showing the phosphorylation of Serine 2 in MRC5 nuclear extract treated or  
720 not with UV-C after siRNA mediated knockdown of indicated factors showing the phosphorylation of  
721 Serine 2. TBP serves as a loading control. **B-D-F-H** Quantification of at least two different experiments  
722 of the RNAP2 phosphorylation/TBP ratio compared with NoUV condition for each siRNA. p-value :  
723 \*\*<0,05.

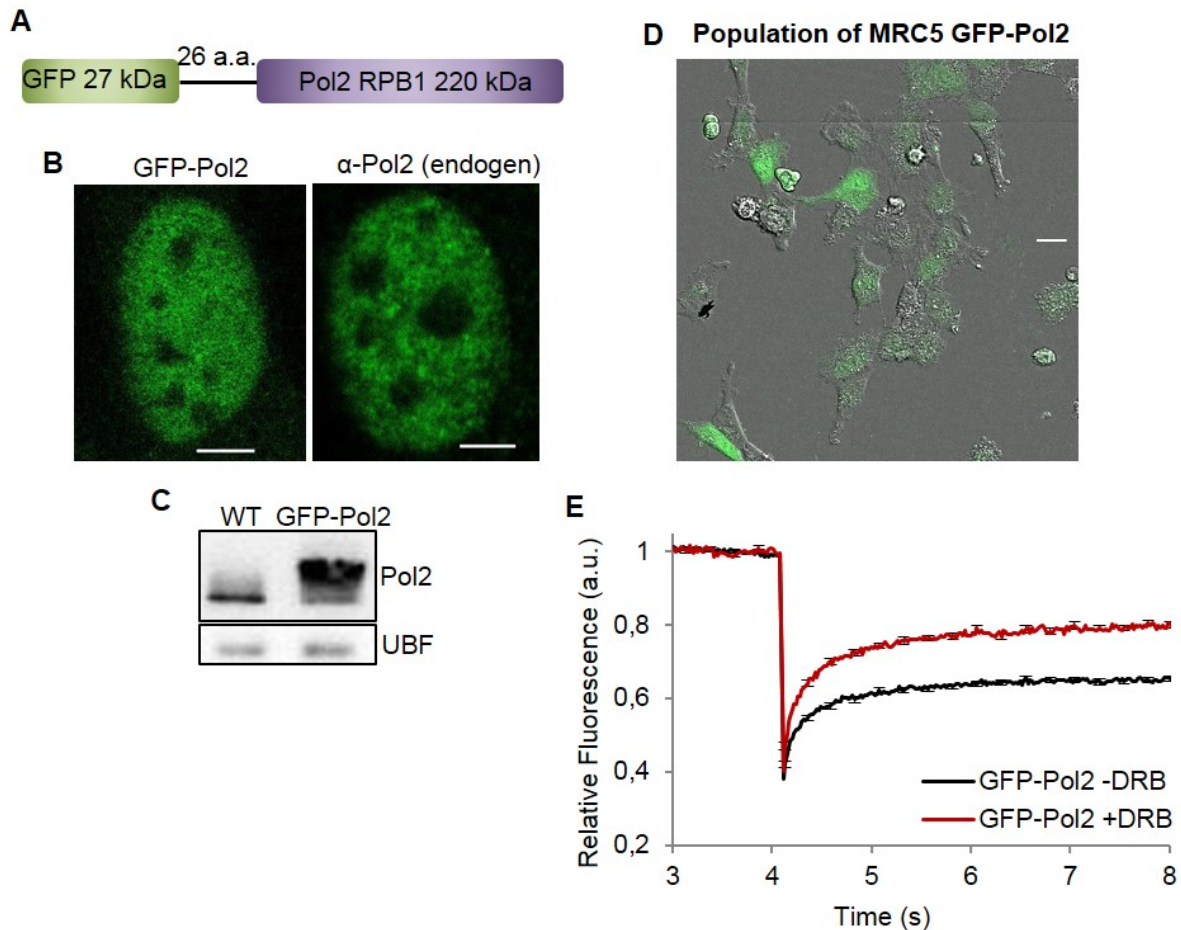

724

725 **Figure S6. Characterization of the stably expressing GFP-pol2 cell lines**

726 **A** Scheme of the GFP-Pol2 fusion proteins **B** Confocal images of GFP-Pol2 expressing cell lines and  
727 immunofluorescence staining of MRC5 cells with a primary antibody against total Pol2. Scale bar =  
728 5µm **C** Immunoblot probed with an anti Pol2 antibody of WT MRC5 cells and MRC5 cells stably  
729 expressing GFP-Pol2. UBF serves as a loading control. **D** Confocal images of GFP-pol2 expressing cell  
730 lines. Scale bar = 20µm **E** FRAP analysis of GFP-Pol2 expressing cells untreated (red line) or treated  
731 with DRB (blue line). Error bars represent the SEM obtained from at least 15 cells.
